1 **Research Paper**

2 **Plasticity of the xylem vulnerability to embolism in poplar relies on quantitative pit**  
3 **properties rather than on pit structure.**

4 Cédric Lemaire <sup>1</sup>, Yann Quilichini <sup>2</sup>, Nicole Brunel-Michac <sup>1</sup>, Jérémie Santini <sup>2</sup>, Liliane  
5 Berti <sup>2</sup>, Julien Cartailier <sup>1</sup>, Pierre Conchon <sup>1</sup>, Éric Badel <sup>1</sup> and Stéphane Herbette <sup>1</sup>.

6 <sup>1</sup> Université Clermont Auvergne, INRAE, PIAF, F-63000 Clermont-Ferrand, France.

7 <sup>2</sup> UMR 6134 SPE, CNRS-Università di Corsica, 20250 Corti, France

8

9 **Keywords**

10 Acclimation, anatomy, cavitation, hydraulic, *Populus tremula x alba*, shade, water stress, X-  
11 ray microCT.

12

13 **Running head**

14 Structural determinants of plasticity of embolism resistance

15

16 **Full address of the corresponding author**

17 Stéphane Herbette

18 UMR INRAE/UCA 547 PIAF

19 Université Clermont Auvergne, Campus Universitaire des Cézeaux,

20 1 Impasse Amélie Murat,

21 TSA 60026, 63178 AUBIERE Cedex

22 FRANCE

23 Stephane.Herbette@uca.fr

24 **Abstract**

25 Knowledge on variations of drought resistance traits are needed to predict the potential of  
26 trees to acclimate to coming severe drought events. Xylem vulnerability to embolism is a key  
27 parameter related to such droughts, and its phenotypic variability relies mainly on  
28 environmental plasticity. We investigated the structural determinants controlling the plasticity  
29 of vulnerability to embolism, focusing on the key elements involved in the air bubble entry in  
30 a vessel, especially the inter-vessel pits. Poplar saplings (*Populus tremula x alba*) grown in  
31 contrasted water availability or light exposure exhibited differences in vulnerability to  
32 embolism in a range of 0.76 MPa. We then characterized the structural changes related to  
33 qualitative and quantitative pit characteristics, from the pit structure to the organization of  
34 xylem vessels, using different microscopy techniques (TEM, SEM, light). X-ray  
35 microtomography analysis allowed observing the vessel vulnerability and testing some of the  
36 relationships between structural traits and vulnerability to embolism inside the xylem. The pit  
37 ultrastructure did not change, whereas the vessel dimensions increased with vulnerability to  
38 embolism and the grouping index and fraction of inter-vessel cell wall decreased with  
39 vulnerability to embolism. These findings holds when comparing trees or when comparing  
40 vessels inside the xylem. These results evidenced that plasticity of vulnerability to embolism  
41 occurs through changes in the quantitative pit properties such as pit area and vessel grouping  
42 rather than on the pit structure.

43 **Keywords**

44 Acclimation, anatomy, cavitation, hydraulic, *Populus tremula x alba*, shade, water stress, X-  
45 ray microCT.

46

## 47 **Introduction**

48 According to the cohesion-tension theory (Steudle 2001), the water columns in the xylem are  
49 under tension, a metastable state. When tension forces increase during droughts, the water  
50 columns are more prone to break, because of cavitation: vapour bubbles invade the impacted  
51 vessels and hence make them embolized as they are not functional anymore, leading to a loss  
52 of xylem conductance. When the loss of conductance reaches a high threshold limit, the above  
53 organs are not supplied with water anymore leading to death (Barigah et al. 2013). For woody  
54 species, drought-induced death is more likely due to xylem hydraulic failure (Anderegg et al.  
55 2015, 2016) caused by embolism in the xylem conduits, even if over process can also  
56 contribute to this death (Hammond et al. 2019) such as the carbon starvation (Hartmann et al.  
57 2015).

58 A global analysis pointed out the narrow hydraulic safety margin at which woody species  
59 usually operate (Choat et al. 2012); inferring that research is needed on the variability for  
60 vulnerability to embolism. Within-species variability for vulnerability to embolism has been  
61 shown for many tree species (e.g. Martínez-Vilalta et al. 2009; Herbette et al. 2010). The  
62 genetic variability for this trait is rather limited in both natural populations (Lamy et al. 2011,  
63 Wortemann et al. 2011) and cultivated species (Jinagool et al. 2015, 2018). This trait would  
64 be genetically canalized (Lamy et al. 2012) such that it varies mainly via plasticity due to  
65 environmental factors (Herbette et al. 2010). Plasticity of vulnerability to embolism was  
66 reported mainly under water stress, with wood formed under drier conditions that tends to be  
67 less vulnerable (Awad et al. 2010, Fichot et al. 2010, Plavcová and Hacke 2012). Other  
68 conditions such as shade or fertilization were associated to an increase in vulnerability to  
69 embolism (Cooke et al. 2005; Barigah et al. 2006; Plavcová and Hacke 2012). However,  
70 information is scarce on the determinants that control the plasticity of vulnerability to  
71 embolism. The structural determinants need to be deciphered first, before searching for their

72 genetic control, as it can be complex to decipher the role of candidate genes (Allario et al.  
73 2018).

74 In angiosperms, water flows in the xylem vessels through bordered pits. These pits are  
75 cavities in the secondary cell wall that allow the inter-vessel water flow while they prevent air  
76 seeding from air-filled vessels to water-filled ones. Inter-vessel pits have been identified as  
77 the key structures for vulnerability to embolism (Lens et al. 2013). Thus, we assume that the  
78 acclimation of vulnerability to embolism to environmental conditions implies changes in the  
79 pit properties. The quantitative and qualitative pit properties that relate to vulnerability to  
80 embolism have to be investigated at the xylem, vessel and pit levels (Lens et al. 2013). The  
81 key role of the pit ultrastructure in vulnerability to embolism has been evidenced in several  
82 studies (e.g. Lens et al. 2011, Tixier et al. 2014), especially the pit membrane thickness  
83 (Jansen et al. 2009). The vulnerability to embolism is also depending on the different  
84 quantitative pit parameters such as the pit area or the vessel connectivity (e.g. Lens et al.  
85 2011). Zimmermann and Jeje (1981) pointed out that the hydraulic vulnerability could be  
86 related to the vessel volume that varies depending on both their diameter (Tyree et al. 1994)  
87 and their length (Scholz et al. 2013a). The relationship between vulnerability to embolism and  
88 pit properties has been intensively studied at the inter-specific level, whereas the determinants  
89 of the plasticity of vulnerability to embolism remains poorly investigated or unclear at the  
90 intraspecific level. For example in poplar, shading caused an increase in vulnerability to  
91 embolism with a decrease in both pit membrane thickness and vessel diameter (Plavcová et al.  
92 2011) whereas a reduced watering caused a decrease in vulnerability to embolism linked with  
93 a decrease in vessel diameter (Awad et al. 2010).

94 In this work, we investigated the relationship between the plasticity of vulnerability to  
95 embolism and changes in the structure related to pit properties at different anatomical levels  
96 on young poplars (*Populus tremula x alba*). We grew sapling poplar clones under three

97 contrasted environmental conditions for two factors (water availability and light exposure)  
98 known to induce vulnerability to embolism plasticity. Then, their xylem anatomy was  
99 analysed in relation to the changes in vulnerability to embolism using different approaches.  
100 Transmission Electron Microscopy (TEM) allowed investigations on the bordered pit  
101 ultrastructure. Parameters related to the pit-field were measured using Scanning Electron  
102 Microscopy (SEM). We also measured quantitative pit parameters related to vessel  
103 dimensions and vessel connectivity using light microscopy and silicon injections. Then, a  
104 local approach using direct observation of embolism spreading at the vessel level by X-ray  
105 microtomography allowed us to analyse some relationships between the hydraulic network  
106 structure and the vulnerability to embolism inside the xylem.

107

## 108 **Materials and Methods**

### 109 **Plant material and growth conditions**

110 *Plant Material.* Saplings of hybrid poplar (*Populus tremula x alba* clone INRA 717-1B4)  
111 were multiplied clonally in vitro on Murashige and Skoog medium on December 2016.  
112 Plantlets were grown in hydroponic solution on February 2017 in a controlled environment  
113 room: 16 h daylight at 21-22 °C, 40  $\mu\text{mol.m}^{-2}.\text{s}^{-1}$  and 18-19 °C night, at 70  $\pm$  10 % relative  
114 humidity. On March 2017, plants were transferred in 1 Litre pots filled with potting soil  
115 (Humustar Terreaux, Champeix, France) with a composition of 25 % brown peat, 40 % blond  
116 peat and 35 % pine barkdust. The pots were placed in a greenhouse at the INRA research  
117 station of Clermont-Ferrand, France (site of Crouël; N 45°77', E 3°14'; 300 m *a.s.l.*). After 20  
118 days, plants were transferred in 10 L pots filled with potting soil. Pots were regularly watered  
119 at soil field capacity. Each pot weighted 6.4  $\pm$  0.4 kg. Ten days later, the specific experimental  
120 growth conditions were applied (see next). After one month of growth, stems were cut at 50

121 cm height. The growth of a new apical bud occurred in May 2017, and any additional bud was  
122 removed. Thus, a single stem completely grew under the new environmental conditions.

123 *Experimental setup.* Plants were split in three groups submitted to different growth conditions:

124 (i) “Control” plants grew under full sunlight and watered at soil field capacity; (ii)  
125 ”Droughted” plants grew under full sunlight and watered at only 25-30 % of soil field  
126 capacity; (iii) ”Shaded” plants shaded by a shadehouse that intercepts 30 % of incident light  
127 and watered at soil field capacity. For the nine Droughted plants, an irrigation at 25-30 % of  
128 soil field capacity was kept constant in each pot individually using balances and valves for  
129 irrigation as described in Niez et al. (2019). We measured the light interception by the  
130 shadehouse by comparing for two months the light intensities recorded between two sensors  
131 (PAR/CBE 80, Solems, Palaiseau, France) placed inside the shadehouse and two sensors  
132 placed outside. The level of water stress was set to be the most restrictive while allowing  
133 growth to produce acclimatized xylem and enough material plant for further analyses. The  
134 stem diameter was continuously measured using a LVDT sensor (Linear Variable Differential  
135 Transformer) on 3 Droughted, 2 Control, 3 Shaded plants. Plant height was also measured  
136 regularly using a tape measure.

137 The day before sampling, predawn water potential ( $\Psi_{pd}$ ) were measured on all plants 1 hour  
138 before the sunrise using a pressure chamber (1505D, PMS Instrument, Albany, OR, USA,  
139 Scholender et al. 1965). The midday water potential ( $\Psi_{mid}$ ) was measured at the solar noon,  
140 between 12h00 and 14h00 the same day.

141 *Sampling protocol.* The sampling was performed on 28 August 2017. Plants were cut at 20 cm  
142 height. The plant shoot was immersed underwater and the 30 cm of the top were removed as  
143 they have few developed xylem. Then, the following stem segments were sampled, from basal  
144 to apical direction:

- 145 i) the 30 cm long basal part of the stem was removed because it was not fully grown under  
146 acclimating conditions;
- 147 ii) the first 50 cm long of the newly developed stem under the acclimation conditions was  
148 wrapped in wet paper in a plastic bag and stored at 4 °C before measurements of vulnerability  
149 to embolism and vessel length;
- 150 iii) the above segment of 6 cm long was devoted to microscopy analyses. It was split into  
151 three subsamples using a razor blade: two segments of 1 cm long were prepared for light  
152 microscopy and TEM, and a third segment of 4 cm long was prepared for SEM;
- 153 iv) when the stem was long enough, an additional segment of 50 cm long was wrapped in wet  
154 paper in a plastic bag, and stored at 4 °C for measurements of specific conductivity ( $K_S$ ) and  
155 for additional measurements of vulnerability to embolism;
- 156 v) the last 10 cm long was kept wrapped in humid paper for a native embolism measurement  
157 performed during the sampling day.

158 Leaves were sampled under water and the mean leaf area (LA) per plant was measured in the  
159 day using an area-meter (Li-3100c, Li-Cor Biosciences, Lincoln, NE, USA).

160 After the sampling, plants were kept in the greenhouse, during the winter 2017. On March  
161 2018, they started growing, still under the same environmental conditions as described above,  
162 and on July 2018 we performed a new sample collection: plants were cut at 25 cm height.  
163 Then the 30 cm long basal part of the stem were cut underwater. A 50 cm long sample was  
164 wrapped in wet paper and stored in a plastic bag at 4 °C for measurements of specific  
165 conductivity ( $K_S$ ).

#### 166 **Hydraulic traits:**

167 *Vulnerability to embolism.* The 50 cm long stem segment was cut underwater at 43 cm long  
168 using a razor blade. Then, the vulnerability to embolism was assessed using the Cavitron  
169 technique (Cochard 2002, Cochard et al. 2005). The centrifugal forces increase water tension

170 in branch segment and allows at the same time measurement of the loss of conductance using  
171 a reference ionic solution of 10 mM KCl and 1 mM CaCl<sub>2</sub> (Cochard et al. 2009). A  
172 vulnerability curve was built by plotting the percentage loss xylem conductance (PLC) vs.  
173 xylem water pressure ( $P$ ). A sigmoidal function was used to fit each curve using the equation  
174 1 (Pammenter and Willigen 1998).

$$175 \quad PLC = \frac{100}{1 + e^{\frac{S(P-P_{50})}{25}}} \quad (1)$$

176 Where  $P_{50}$  is the pressure causing 50 % loss of conductance, and  $S$  the slope of the curve at  
177 this point.

178 *Specific conductivity.* Stem segments of 50 cm long were cut underwater at a length ( $L_{stem}$ ) of  
179 40 cm long using a razor blade for Droughted ( $n = 8$ ), Control ( $n = 9$ ) and Shaded ( $n = 9$ )  
180 plants. The apical end of the sample was sealed to a tubing system (polytetrafluoroethylene  
181 film) and plugged to an embolism meter (Xyl'em, Bronkhorst, Montigny les Cormeilles,  
182 France). The initial conductance ( $K_i$ ) is then measured under low pressure (2 to 7 kPa) using a  
183 solution of 10 mM KCl and 1 mM CaCl<sub>2</sub>. The xylem area  $A_x$  of the distal end of the sample  
184 was measured on a cross section using a scanner (V800, Epson, Nagano, Japan). The  
185 measurement of  $A_x$  was performed on the scanned image using the ImageJ software (version  
186 v.1.52c) (Schneider et al. 2012). The Specific Conductivity  $K_S$  was defined according to  
187 equation 2.

$$188 \quad K_S = \frac{K_i \times L_{stem}}{A_x} \quad (2)$$

189 *Native Embolism.* The native embolism of the stem segments of 10 cm long were measured  
190 the day of their harvest for Droughted ( $n = 9$ ), Control ( $n = 5$ ) and Shaded ( $n = 6$ ). Each  
191 sample was cut underwater using a razor blade to a length of 8 cm. Then, the initial  
192 conductance ( $K_i$ ) was measured under low pressure (2 to 7 kPa) with the same method and the  
193 same solution as specific conductivity. Then, the sample was flushed with the same solution  
194 two times for 5 min under high pressure (0.1 to 0.2 MPa) in order to remove embolism. A



195 new measurement of conductance without embolism gives the maximum conductance ( $K_{max}$ )  
196 of the sample. The native embolism was calculated according to the equation 3.

$$197 \quad \text{Native Embolism} = \left(1 - \frac{K_i}{K_{max}}\right) \times 100 \quad (3)$$

### 198 **Light microscopy**

199 Samples of 1 cm long were cut into 3 x 3 mm<sup>2</sup> blocks then they were immersed in  
200 Karnovsky's fixative solution under vacuum for 30 min, then stored at 4 °C in the fixative  
201 solution up to the next step. Then, they were dehydrated in an ethanol series (50, 70, 80, and  
202 95 %) and embedded in LR White medium. Transverse slices of 2 to 3 µm thick were cut  
203 using an ultramicrotome (Om U2, Reichert, Vienna, Austria). Sections were stained with 1 %  
204 (w/v) toluidine blue, washed 4 times with water and mounted in Eukitt (Sigma-Aldrich, St-  
205 Louis, MO, USA). Images were processed using a microscope (Zeiss Axio Observer Z1), a  
206 digital camera (AxioCam MRc) and Zen imaging software system (Zeiss, Jena, Germany).

207 Image analyses were performed using ImageJ software. The vessel diameter ( $D_v$ ) was  
208 estimated to be the diameter of the circle having the same area as the vessel lumen (for the  
209 symbols, see Table 1). The contact fraction ( $F_c$ ) was measured for each vessel as the ratio of  
210 wall length shared with other vessels over the vessel perimeter. The grouping index (GI) was  
211 measured as the mean number of vessels per group and the solitary index (SI) as the ratio of  
212 the number of solitary vessels to the total number of vessels. These parameters were measured  
213 for each individual slice containing a mean of 850 vessels, for Droughted (n = 9), Control (n =  
214 5) and Shaded (n = 6) plants.

### 215 **Vessel length**

216 The vessel length was measured by the silicon injection method (Sperry et al. 2005, Scholz et  
217 al. 2013b) on the samples used for Cavitron technique, after five months of drying at room  
218 temperature. A fluorescent optical brightener (CAS number: 7128-64-5, Sigma-Aldrich, St-  
219 Louis, MO, USA) was mixed in chloroform (1 % w/w) and added to a volume of silicon

220 (BLUESIL RTV-141 A, Bluestar Silicones, Lyon, France) with a proportion of one drop of  
221 solution per gram of silicon. A Silicone hardener (BLUESIL RTV-141 B, Bluestar Silicones)  
222 was added to the mixture in 1:10 proportion. The mixture was then injected under pressure  
223 (30 to 40 kPa) basipetally in the stem sample using a pressure chamber during at least 8 hours.  
224 After silicone hardening (3 days at room temperature), the samples were cut 5 mm far from  
225 the injection point; then every 20 mm. For each segment, one 25  $\mu\text{m}$  thick slice was cut using  
226 a rotary microtome (RM2165, Leica Microsystems, Wetzlar, Germany). Cross section slices  
227 were dyed with Astra Blue and mounted with a Lugol's iodine solution.

228 Images were obtained using a fluorescence microscope (Axio Observer Z1) equipped with a  
229 300 to 400 nm band pass excitation filter, a digital camera (AxioCam 506), Zen imaging  
230 software system (Zeiss, Jena, Germany) and analysed using the ImageJ software. Fluorescent  
231 vessels highlighted the open vessels, while white light allowed counting the total number of  
232 vessels. The decrease of the ratio of open vessels ( $N_x$ ) (*i.e.* fluorescent vessels) to the total  
233 number of vessels ( $N_0$ ) over the distance ( $x$ ) from the end of the sample followed a Weibull  
234 function (equation 4) where  $k$  is the best-fit extinction coefficient (Cohen et al. 2003).

$$235 \quad N_x = N_0 \times e^{-kx} \quad (4)$$

236 The fraction of conduits of length  $x$  ( $P(x)$ ) is obtained by multiplying  $x/N_0$  to the second  
237 derivative of equation 4 (Wheeler et al. 2005):

$$238 \quad P(x) = x \times k^2 \times e^{-kx} \quad (5)$$

239 The continuous cumulative function of vessel length ( $L_v$ ) probability is a function given in the  
240 equation 6.

$$241 \quad f(x) = \int_0^{L_v} x k^2 \cdot e^{-kx} dx \quad (6)$$

242 When this cumulative function is equal to 0.5, this gives the median value of vessel length  
243 ( $L_v$ ) (equation 7).

$$244 \quad f(L_v) = -(kL_v + 1) \cdot e^{-kL_v} + 1 = 0.5 \quad (7)$$

245 The solution of the equation 7 gives the median vessel length  $L_v = 1.678/k$ . This vessel  
246 length was estimated for 7 Droughted, 5 Control and 5 Shaded stem samples.

### 247 **Transmission Electron Microscopy**

248 Fresh samples of 1 cm long were cut into 2 to 4 mm<sup>3</sup> blocks, immersed in Karnovsky's  
249 fixative solution under vacuum for 30 min, then stored at 4 °C in the fixative solution for 3  
250 weeks. Blocks were recut into 1 to 2 mm<sup>3</sup> pieces, then they were secondary fixed for 4 hours  
251 at ambient temperature in a 0.1M phosphate-buffered osmium tetroxide solution (1 %), pH  
252 7.4. Then, they were dehydrated in an ethanol series (25, 50, 70, 100, and 100 %) and  
253 embedded in Epoxy resin using Epoxy medium kit (Sigma-Aldrich, St-Louis, MO, USA).  
254 Then, ultra-thin sections (60-90 nm) were cut using an ultramicrotome (PowerTome PC,  
255 RMC Boeckeler, Tucson, AZ, USA). The sections were placed on 200- and 300-mesh copper  
256 grids and stained with contrast solutions: UranylLess (Delta Microscopies, Mauressac, France)  
257 and lead citrate. Sections were observed using a transmission electron microscope (H-7650,  
258 Hitachi High-Technologies Corporation, Tokyo, Japan) at a voltage of 80 kV. Measurements  
259 of pit features were performed on images with pits showing two apertures. Pits were  
260 characterized for their diameter ( $D_p$ ), their aperture diameter ( $D_a$ ), their depth of pit chamber  
261 ( $L_p$ ) and their membrane thickness ( $T_m$ ). For each pit,  $D_a$  was the mean of two measurements  
262 while  $L_p$  and  $T_m$  were the mean of four measurements. Pit features were measured for five  
263 individual trees for each growth condition, with at least 10 pits measured per individual tree.

### 264 **Scanning Electron Microscopy**

265 Fresh samples were fixed in glutaraldehyde 3 % fixative solution and stored at 4 °C for at  
266 least 1 month. Samples of 4 cm long were cut in a longitudinal way and were dehydrated in an  
267 ethanol series (30, 50, 75, and 100 %). After dehydration, samples were immersed in a 1:1  
268 solution hexamethyldisilazane (HMDS) + ethanol 100 % for 30 min and immersed in pure  
269 HMDS for 30 min. After air drying overnight under a hood, the samples were mounted on

270 aluminium stubs with carbon double-sided adhesive disks, coated with gold/palladium in a  
271 sputter coater (SC7640, Quorum Technologies Ltd, Newhaven, U.K.), and finally observed  
272 using a scanning electron microscope (S-3400N, Hitachi High-Technologies Corporation,  
273 Tokyo, Japan) at a voltage of 5 kV. The portion of area covered by bordered pits in each inter-  
274 vessel pit-field ( $F_{pf}$ ) was measured using the ImageJ software. Five samples were measured  
275 per growth condition, and seven pit-fields were characterized per sample.

### 276 **Calculation of supplemental hydraulic and structural traits**

277 Theoretical conductivities ( $K_h$ ) of all samples characterized for light microscopy were  
278 calculated according to Scholz et al. (2013b) and converted into  $\text{mol.s}^{-1}.\text{MPa}^{-1}.\text{m}^{-1}$   
279 (equation 8).

$$280 \quad K_h = \frac{\sum \frac{\pi D_v^4}{128 \eta}}{A_x} \times \frac{\rho}{M_{\text{H}_2\text{O}}} \quad (8)$$

281 with  $\eta$  the viscosity index of water ( $1.002 \times 10^{-9} \text{ m}^4.\text{MPa}^{-1}.\text{s}^{-1}$  at 20 °C),  $\rho$  the density of water  
282 ( $9.982 \times 10^5 \text{ g.m}^{-3}$ ),  $M_{\text{H}_2\text{O}}$  the water molar mass ( $18.0 \text{ g.mol}^{-1}$ ) and  $A_x$  the xylem area.

283 The pit fraction ( $F_p$ ) was defined as the product of the pit-field fraction ( $F_{pf}$ ) and contact  
284 fraction ( $F_c$ ) (equation 9).

$$285 \quad F_p = F_{pf} \times F_c \quad (9)$$

286 The pit fraction was measured on five individual trees for each growth condition.

287 The vessel area ( $A_v$ ) was calculated as the area of a cylinder according to the equation 10.

$$288 \quad A_v = D_v \times L_v \times \pi + 2\pi \left(\frac{D_v}{2}\right)^2 \quad (10)$$

289 It was measured for 7 Droughted, 5 Control and 5 Shaded individuals.

290 The pit area per vessel ( $A_p$ ) was calculated as the product of the two above-cited traits  
291 (equation 11).

$$292 \quad A_p = A_v \times F_p \quad (11)$$

293 It was measured for 4 Droughted, 5 Control and 4 Shaded individuals.

294 Xylem water potentials at the onset of xylem embolism ( $P_{12}$ ) and at full embolism ( $P_{88}$ ) were  
295 calculated using equation 12 and 13 respectively (Domec and Gartner 2001), with  $P_{50}$  and  $S$   
296 from equation 1.

$$297 \quad P_{12} = P_{50} + \frac{50}{S} \quad (12)$$

$$298 \quad P_{88} = P_{50} - \frac{50}{S} \quad (13)$$

299

### 300 **Measurement of individual vessel vulnerability to embolism using X-Ray** 301 **microtomography**

302 Four stem segments from Droughted and Control plants were sampled and prepared in the  
303 same condition as for vulnerability to embolism measurements. We used the techniques  
304 described in Cochard et al. (2015). Segments were cut underwater at 43 cm long using a razor  
305 blade, sealed in liquid paraffin wax in order to prevent dehydration during the  
306 microtomography scans. A first 21 min scan was acquired using a X-ray microtomography  
307 system (Phoenix nanotom, General Electric, Boston, MA, USA) at the centre of the segment  
308 as described below to reveal the native state of embolism in each shoot. The field-of view was  
309  $7.8 \times 7.8 \times 7.8 \text{ mm}^3$  and covered each full cross section of the samples. X-ray source settings  
310 were 60 kV and 240  $\mu\text{A}$ . 1000 images were recorded during the 360 ° rotation of the sample.  
311 Then, the paraffin was broken at the ends in order to allow the water flow and the sample was  
312 set in a Cavitron during 5 min at 0.08 MPa, immersed in paraffin and scanned again with the  
313 microtomograph at the same location than previously to observe the new embolism status.  
314 The same procedure was repeated for increasing pressure steps, until - 4 MPa (Fig. 1).  
315 Then, the stem sample was cut in the air at 5 mm above the scanned section in order to  
316 embolize 100 % of the functional vessels and a last microtomography scan was performed in  
317 order to visualize the complete vessel network.

318 The sample was then dried several days in room conditions and a 25  $\mu\text{m}$  thick cross section  
319 slice was cut with a rotary microtome (RM2165, Leica Microsystems). Sections were dyed  
320 with series of baths as following: bleach (about 15 sec), acetic acid, Astra blue (1 min), acetic  
321 acid, safranin (1 min), acetic acid with a water bath between each solution, then an ethanol  
322 series (50, 70, 100 and 100 %). The sections were mounted in Eukitt. Images were processed  
323 using a microscope (Zeiss Axio Observer Z1), a digital camera (AxioCam MRc) and Zen  
324 imaging software system (Zeiss, Jena, Germany). Image analyses were performed using Fiji  
325 software (under ImageJ version 2.0.0-rc-68/1.52h) (Schindelin et al. 2012, Schneider et al.  
326 2012). Diameter of each vessel ( $D_v^*$ ) was estimated as the diameter of the circle with the same  
327 area as the vessel lumen. For each vessel, the number of vessel in the group (Group Size; GS)  
328 and the fraction of membrane in contact with other vessels ( $F_c^*$ ) was also measured.

329 The microtomography scans were reconstructed in three-dimension (3D) using Phoenix  
330 datosx 2 software (General Electric, Boston, MA, USA) with spatial resolution of  
331  $6.8 \times 6.8 \times 6.8 \mu\text{m}^3$  per voxel. Then, for each 3D-reconstruction, a cross section was extracted  
332 at the exact same location as with the microscopy section. Using the series of x-ray scans, the  
333 embolism pressure in a vessel ( $P_e$ ) was defined as the pressure step from which the vessel  
334 appeared to be air-filled.

335 Images from microtomography observation (virtual cross sections built by 3D reconstruction)  
336 and microscopy observation (stem cross section observed by light microscopy) were aligned  
337 using the “Align image by line ROI” tool of Fiji software. A unique identification number  
338 was given to each vessel observed in images from both techniques, in order to link the  
339 embolism pressure with anatomical parameters (Fig. 1, E). A total of 2570 vessels were  
340 identified. Vessels were grouped per  $D_v^*$ , per  $F_c^*$  and per GS classes. Classes were sized to be  
341 as uniform as possible, counting from 183 up to 748 vessels. A total of 1100 solitary vessels

342 were grouped in the same class when required. Cumulative number of embolized vessels were  
343 plotted according to their  $P_e$  and, for each class, a Weibull function was fit (equation 1).

#### 344 **Statistical analysis**

345 The statistical analysis was performed using the RStudio software (version 1.1.456; running  
346 under R core version 3.5.1, R Development Core Team 2008). One way ANOVA were used  
347 for comparing the means between the three growth conditions. When we found a significant  
348 difference, we referred to Tukey's multiple range test at  $P < 0.05$  to compare the mean values  
349 between growth conditions. The correlation between the structural traits and the  $P_{50}$  and  $P_e$   
350 were calculated using linear regressions.

351

#### 352 **Results**

353 Continuous recordings of the radial growth showed a significant lower growth for the  
354 Droughted plants (Table 2). These plants also showed a lower height, lower leaf area, lower  
355  $\Psi_{pd}$  and lower  $\Psi_{mid}$ , demonstrating that these plants grown under a constrained water regime  
356 were affected for their development when compared to Control and Shaded plants. The higher  
357 leaf area for Shaded plants compared to Control plants is an evidence that the shading  
358 conditions affected the plant development.

359 Growing clone plants under different environmental conditions aimed to induce wide  
360 variations in xylem vulnerability to embolism. The three growth conditions spread the  
361 measured  $P_{50}$  in a range from - 2.00 to - 3.47 MPa. A significantly lower  $P_{50}$  was found on  
362 Droughted when compared to Control and Shaded plants ( $p$ -value  $< 0.001$ , Table 2), while  
363 the slopes of the vulnerability curves were not different depending on the growth conditions  
364 (Fig. 2, A). Despite a slightly higher native embolism measured on Droughted plants  
365 compared to Shaded plants,  $\Psi_{mid}$  was higher than the inflexion point of the vulnerability curve  
366 ( $P_{12}$ ) for each growth condition. This allows excluding any effect of these quite low native

367 embolism on measured  $P_{50}$ . There was no difference on mean  $K_S$  between the growth  
368 conditions (Fig. 2, B), suggesting no plasticity for this trait in our experimental conditions.  
369 When considering the vessel diameter measured by light microscopy, a reduced  $K_h$  was  
370 measured in the Droughted plants compared to Control and Shaded plants (Table 2).  
371 The analyses combining diverse observation methods (light microscopy, TEM, SEM),  
372 allowed measuring a large set of anatomical traits from tissue to pit level. The correlation  
373 between these traits and the  $P_{50}$  was assessed (Fig. 3, 4).  
374 The traits measured at tissue level (GI, SI and  $F_p$ ) showed a strong linear correlation with  $P_{50}$   
375 ( $R^2 > 0.70$ ;  $p$ -value  $< 0.001$ ; Fig. 3, 4), except  $F_c$  that exhibited a weaker correlation  
376 ( $R^2 = 0.377$ ;  $p$ -value = 0.0040). These results put in light a relationship between vessels  
377 connectivity and grouping and vulnerability to embolism (negative relationship for  $F_c$ , GI and  
378  $F_p$ ; positive relationship for SI). However, we also found no correlation between Pit-field  
379 fraction ( $F_{pt}$ ) and  $P_{50}$ , with no variation among the growth conditions (Table 3). We observe a  
380 strong positive relationship ( $p$ -value  $< 0.001$ ) between  $P_{50}$  and the vessel dimensions ( $L_v$ ,  $D_v$   
381 and  $A_v$ ) showing that larger vessels with larger pit area tend to be associated with an increase  
382 in vulnerability to embolism ( $R^2 > 0.75$ ;  $p$ -value  $< 0.001$ ). The positive correlation between  
383  $P_{50}$  and  $A_p$  ( $R^2 = 0.782$ ;  $p$ -value  $< 0.001$ , Fig. 4) enlightened the link between the area of  
384 vessel covered by bordered pits and the xylem vulnerability to embolism.  
385 No linear correlation appeared between the qualitative pit parameters ( $D_a$ ,  $D_p$ ,  $L_p$  and  $T_m$ ) and  
386 the  $P_{50}$ : we observed no variation for  $D_a$ ,  $D_p$  and  $T_m$  among growth conditions.  
387 The direct microtomographic visualization of embolism inside the xylem (Fig. 1) allowed  
388 evaluating the vulnerability to embolism of individual vessels classified depending on their  
389 structural parameters (Fig. 5). The correlation between  $D_v^*$  and  $P_e$  (Fig. 5, A) was clear: wider  
390 vessels appeared more vulnerable than the narrower ones.  $F_c^*$  showed a smaller influence on  
391  $P_e$  (Fig. 5, B): solitary vessels ( $F_c^* \leq 1$  %) and weakly connected vessels ( $1 < F_c^* \leq 20$  %) were



392 more vulnerable than the highly connected vessels ( $F_c^* > 20\%$ ). The link between GS and  $P_e$   
393 (Fig. 5, C) appeared to be the less clear: the most vulnerable vessels were the solitary ones  
394 whereas the grouped vessels ( $GS \geq 2$ ) were less vulnerable. Despite a significant correlation  
395 between  $P_e$  and  $D_v^*$ ,  $F_c^*$  and GS ( $p\text{-value} < 0.001$ ; Fig. 5, D), the strength of the correlation  
396 was very poor ( $R^2 < 0.25$ ).

397

## 398 **Discussion**

399 The range for  $P_{50}$  plasticity induced by the growth conditions was large: 0.76 MPa between  
400 the mean  $P_{50}$  of Droughted and Shaded plants (Table 2; Fig. 2, A) and up to 1.47 MPa  
401 between two individuals. This is consistent with previous studies: Awad et al. (2010) got a  
402 difference of 0.63 MPa between droughted and well-watered plants; Plavcová and Hacke  
403 (2012) got a difference of 1.08 MPa between droughted and shaded *Populus trichocarpa* x  
404 *deltooides* plants. In this latter study, they reported a variation of  $P_{50}$  up to 1.56 MPa but their  
405 setup also included treatment in nutrient availability, and they recorded r-shaped curves that  
406 cannot be compared with our S-shaped curves. Therefore, the plasticity induced by our  
407 experimental setup was probably close to the maximum we could expect according to the  
408 literature.

409 The absence of difference in specific hydraulic conductivity ( $K_s$ ) between, Droughted and  
410 Control plants (Table 2; Fig. 2, B) not surprising since poor correlation between vulnerability  
411 to embolism and  $K_s$  has been reported in a meta-analysis (Gleason et al. 2016). Furthermore,  
412 the lack of trade-off between hydraulic efficiency and safety was observed within species  
413 (Awad et al. 2010, Plavcová and Hacke 2012, Schuldt et al. 2016). A significant decrease of  
414 the theoretical conductivities ( $K_h$ ) was found for Droughted plants compared to other plants  
415 (Table 2), relying on a decrease in vessel diameter ( $D_v$ ) (Table 3); whereas the pit structure  
416 was not modified (Table 3). The decrease in lumen conductance in Droughted plants may be

417 offset by other changes we did not investigate, such as vessel wall carving, pit biochemistry or  
418 pit membrane porosity.

419  $P_{50}$  was correlated with anatomical traits related to quantitative pit characteristics measured at  
420 the xylem and vessel levels (significant correlations with  $R^2 > 0.7$  for 7 out of the 9 traits; Fig.  
421 3, 4). By contrast, no correlation was found with the traits related to the qualitative pit  
422 characteristics we measured, i.e. the pit dimensions ( $D_a$ ,  $D_p$ ,  $L_p$  and  $T_m$ ; Fig. 3). Thus, the pit  
423 ultrastructure does not appear as a driver of the plasticity of vulnerability to embolism in  
424 *Populus tremula x alba*. The pit membrane pore sizes contribute to the differences in  
425 vulnerability to embolism (Jansen et al. 2009); but this parameter is difficult to measure  
426 accurately because pores include a series of various pore constrictions, and the most narrow  
427 constriction will be the main bottleneck. The role of the biochemical composition of the pit  
428 membrane in vulnerability to embolism plasticity cannot be excluded. Once again, pit  
429 biochemistry was investigated using immunolabelling (Kim et al. 2011, Herbette et al. 2015),  
430 but accurate techniques are needed to investigate within-species difference in  $P_{50}$ . Moreover,  
431 calcium in pit membrane was reported to be a major determinant of between-species  
432 differences in vulnerability to embolism, but it was not involved in the plasticity of  
433 vulnerability to embolism (Herbette and Cochard 2010).

434 Pit ultrastructure, especially the pit membrane thickness were identified as the major traits  
435 involved in variation in vulnerability to embolism between species (Jansen et al. 2009; Tixier  
436 et al. 2014). In addition, between species differences in vulnerability to embolism also depend  
437 on pit mechanical behaviour (Tixier et al. 2014). The probability for air seeding through large  
438 pores is expected to be higher when more pits are present (rare pit hypothesis proposed by  
439 Christman et al. 2009). The pit area can thus explain differences in vulnerability to embolism  
440 among some angiosperm groups but not others (Lens et al. 2013). This trait, which depends  
441 on the vessel dimensions and xylem organization, does not appear very relevant to explain

442 variability in vulnerability to embolism between species. Lens et al. (2011) tested the  
443 relationship between several qualitative and quantitative pit properties and vulnerability to  
444 embolism for 11 acer species. They found that vulnerability to embolism strongly correlated  
445 with depth of bordered pit chamber ( $L_p$ ) and pit membrane thickness ( $T_m$ ) whereas no  
446 relationship was found between vulnerability to embolism and vessel diameter ( $D_v$ ) and total  
447 pit area per vessel ( $A_p$ ). By contrast, our results suggest that the plasticity of vulnerability to  
448 embolism plasticity is controlled by the xylem organization and vessel dimensions, and not by  
449 changes in pit structure. Thus, the mechanisms controlling the inter-specific variability in  
450 vulnerability to embolism seem to be different from the drivers of the within species  
451 plasticity.

452 Vulnerability curves are commonly established by measuring the impact of embolism on the  
453 conductance, but not by measuring the embolism rates. Because an embolized vessel can  
454 induce different effects on the xylem conductance and thus the value of  $P_{50}$ , depending on  
455 vessel size and xylem organisation, “hydraulic vulnerability” would be a more suitable term  
456 when we compare xylems for  $P_{50}$  using methods based on hydraulic measurements. That is  
457 why we will use now this term in the following lines. X-ray microtomography investigations  
458 allow the visualisation of embolized vessels, and not the loss of hydraulic conductance. Thus,  
459 it really allows measuring the vulnerability to embolism and not the hydraulic vulnerability.

460 Our results showing a strong relationship between  $P_{50}$  and some vessel and xylem parameters  
461 provide three non-exclusive explanations for the acclimation of hydraulic vulnerability. This  
462 latter relies on changes in vulnerability to embolism of the vessels or on changes in the effect  
463 of the embolism on conductance. First, our study shows that vulnerable individuals exhibited  
464 bigger vessels (both longer ( $L_v$ ) and wider ( $D_v$ ); Fig. 3). When a large vessel embolizes, it  
465 generates a greater impact on the hydraulic conductivity compared to a smaller vessel. Thus, a  
466 xylem having a high proportion of large vessels undergoes an important drop of conductivity

467 after each vessel embolism. Second, we found that vulnerable xylems had a greater SI and a  
468 lower GI and  $F_c$ . Redundancy in the xylem has already been linked with a lower hydraulic  
469 vulnerability using modelling (Ewers et al. 2007). High connectivity and grouping is an  
470 efficient way to maintain the hydraulic conductance despite embolized vessels in the xylem  
471 by providing alternative pathways to the water flow (Carlquist 1966, Schuldt et al. 2016).  
472 Third, larger vessels have a larger pit area per vessel ( $A_p$ ) and would thus be more prone to  
473 embolism, according to the pit area hypothesis (Christman et al. 2009). Direct observations  
474 using X-ray microtomography allowed monitoring the dynamics of xylem embolism and in  
475 particular to determine the embolism pressure for each vessel in a stem sample (Fig.1; Fig. 5).  
476 This approach supports the third explanation, since larger vessels ( $D_v^*$ ) had a higher  
477 vulnerability to embolism— as noticed by Cai and Tyree (2010) using a statistical and indirect  
478 and destructive technique. Nevertheless, the poor correlation (low  $R^2$  values) between the  
479 embolism pressure of each vessel ( $P_e$ ) and  $D_v^*$ ,  $F_c^*$  or GS give us clue that the rare pit  
480 hypothesis is far from being sufficient for explaining the hydraulic vulnerability inside a stem  
481 sample. Other additional mechanisms would be involved to explain the plasticity of hydraulic  
482 vulnerability observed among growth conditions: they would include the effect of redundancy  
483 and of vessel embolized volume on the loss of conductance. That is why we assume that the  
484 different mechanisms we described here act together to design the hydraulic vulnerability  
485 during acclimation.

486 In conclusion, we found that the acclimation of vulnerability to embolism to contrasted  
487 growth conditions occurs without any change in pit ultrastructure, contrary to what was  
488 reported when comparing species. Thus, within-species plasticity and between-species  
489 variability for vulnerability to embolism rely on different mechanisms. Instead, we showed  
490 that an increase in resistance to embolism in poplar is related to an increase in vessels  
491 connectivity and grouping and a decrease in vessel dimensions, leading to reduce the likely of

492 air seeding through a pit in a vessel and the effect of such embolism events on hydraulic  
493 conductance. This study will allow focusing on the relevant candidate genes controlling  
494 vulnerability to embolism such as those involved in vessels grouping and connectivity or  
495 vessel dimensions. These genes include the aquaporins involved in cell expansion during  
496 xylogenesis (Plavcová et al. 2013), the genes controlling the cell wall metabolism in xylem  
497 such as *VND6*, *VND7* and *MYB46*, which expression levels changed in response to an abiotic  
498 stress (Plavcová et al. 2013, Taylor-Teeples et al. 2016) or *CLE* genes (*CLE41* and *CLE44*)  
499 that repress the xylem differentiation (De Rybel et al. 2016).

500

#### 501 **Funding**

502 This work was supported by European Union within the context of European Regional  
503 Development Fund (ERDF).

#### 504 **Acknowledgements**

505 The authors thanks Christelle Boisselet and Brigitte Girard for the plant production,  
506 Christophe Serre for the LDVT preparation, Romain Souchal for the balance and LVDT  
507 installation, Patrice Chaleil, Aline Faure and Stephane Ploquin for watching the plants in the  
508 greenhouse, André Marquier for the PAR measurements and Felix Hartmann for his help in  
509 calculating the vessel length.

#### 510 **Authors' contributions**

511 C.L. and S.H. designed the study and wrote the manuscript with contributions from all  
512 authors. C.L., P.C. and J.C. performed field work and hydraulic measurements; C.L., N.B-M.,  
513 Y.Q., L.B. and J.S. performed electron microscopy; C.L., N.B-M., P.C. performed light  
514 microscopy; C.L., P.C., E.B. and J.C. performed X-ray microCT; C.L., P.C. and E.B.  
515 performed image analysis. All authors approved this manuscript.

516 **References**

- 517 Allario T, Tixier A, Awad H, Lemaire C, Brunel N, Badel É, Barigah TS, Julien J-L, Peyret P,  
518 Mellerowicz EJ, Cochard H, Herbette S (2018) PtxtPME1 and homogalacturonans  
519 influence xylem hydraulic properties in poplar. *Physiologia Plantarum* 163:502–515.
- 520 Anderegg WRL, Flint A, Huang C, Flint L, Berry JA, Davis FW, Sperry JS, Field CB (2015)  
521 Tree mortality predicted from drought-induced vascular damage. *Nature Geosci*  
522 8:367–371.
- 523 Anderegg WRL, Klein T, Bartlett M, Sack L, Pellegrini AFA, Choat B, Jansen S (2016)  
524 Meta-analysis reveals that hydraulic traits explain cross-species patterns of drought-  
525 induced tree mortality across the globe. *PNAS* 113:5024–5029.
- 526 Awad H, Barigah T, Badel É, Cochard H, Herbette S (2010) Poplar vulnerability to xylem  
527 cavitation acclimates to drier soil conditions. *Physiologia Plantarum* 139:280–288.
- 528 Barigah TS, Charrier O, Douris M, Bonhomme M, Herbette S, Améglio T, Fichot R,  
529 Brignolas F, Cochard H (2013) Water stress-induced xylem hydraulic failure is a  
530 causal factor of tree mortality in beech and poplar. *Ann Bot* 112:1431–1437.
- 531 Barigah TS, Ibrahim T, Bogard A, Faivre-Vuillin B, Lagneau LA, Montpied P, Dreyer E  
532 (2006) Irradiance-induced plasticity in the hydraulic properties of saplings of different  
533 temperate broad-leaved forest tree species. *Tree Physiol* 26:1505–1516.
- 534 Cai J, Tyree MT (2010) The impact of vessel size on vulnerability curves: data and models for  
535 within-species variability in saplings of aspen, *Populus tremuloides* Michx. *Plant, Cell*  
536 *& Environment* 33:1059–1069.
- 537 Carlquist S (1966) Wood Anatomy of Compositae: A Summary, With Comments on Factors  
538 Controlling Wood Evolution. *Aliso: A Journal of Systematic and Evolutionary Botany*  
539 6:25–44.
- 540 Choat B, Jansen S, Brodribb TJ, Cochard H, Delzon S, Bhaskar R, Bucci SJ, Feild TS,  
541 Gleason SM, Hacke UG, Jacobsen AL, Lens F, Maherali H, Martínez-Vilalta J, Mayr  
542 S, Mencuccini M, Mitchell PJ, Nardini A, Pittermann J, Pratt RB, Sperry JS, Westoby  
543 M, Wright IJ, Zanne AE (2012) Global convergence in the vulnerability of forests to  
544 drought. *Nature* 491:752–755.
- 545 Christman MA, Sperry JS, Adler FR (2009) Testing the ‘rare pit’ hypothesis for xylem  
546 cavitation resistance in three species of *Acer*. *New Phytologist* 182:664–674.
- 547 Cochard H (2002) A technique for measuring xylem hydraulic conductance under high  
548 negative pressures. *Plant, Cell & Environment* 25:815–819.
- 549 Cochard H, Badel E, Herbette S, Delzon S, Choat B, Jansen S (2013) Methods for measuring  
550 plant vulnerability to cavitation: a critical review. *J Exp Bot* 64:4779–4791.
- 551 Cochard H, Damour G, Bodet C, Tharwat I, Poirier M, Améglio T (2005) Evaluation of a new  
552 centrifuge technique for rapid generation of xylem vulnerability curves. *Physiologia*  
553 *Plantarum* 124:410–418.

- 554 Cochard H, Delzon S, Badel É (2015) X-ray microtomography (micro-CT): a reference  
555 technology for high-resolution quantification of xylem embolism in trees. *Plant, Cell  
556 & Environment* 38:201–206.
- 557 Cochard H, Hölttä T, Herbette S, Delzon S, Mencuccini M (2009) New insights into the  
558 mechanisms of water-stress-induced cavitation in conifers. *Plant Physiology* 151:949–  
559 954.
- 560 Cohen S, Bennink J, Tyree M (2003) Air method measurements of apple vessel length  
561 distributions with improved apparatus and theory. *J Exp Bot* 54:1889–1897.
- 562 Cooke JEK, Martin TA, Davis JM (2005) Short-term physiological and developmental  
563 responses to nitrogen availability in hybrid poplar. *New Phytologist* 167:41–52.
- 564 De Rybel B, Mähönen AP, Helariutta Y, Weijers D (2016) Plant vascular development: from  
565 early specification to differentiation. *Nat Rev Mol Cell Biol* 17:30–40.
- 566 Domec J-C, Gartner BL (2001) Cavitation and water storage capacity in bole xylem segments  
567 of mature and young Douglas-fir trees. *Trees* 15:204–214.
- 568 Ewers FW, Ewers JM, Jacobsen AL, López-Portillo J (2007) Vessel redundancy: Modeling  
569 safety in numbers. *IAWA Journal* 28:373–388.
- 570 Fichot R, Barigah TS, Chamaillard S, Le Thiec D, Laurans F, Cochard H, Brignolas F (2010)  
571 Common trade-offs between xylem resistance to cavitation and other physiological  
572 traits do not hold among unrelated *Populus deltoides* × *Populus nigra* hybrids. *Plant,  
573 Cell & Environment* 33:1553–1568.
- 574 Gleason SM, Westoby M, Jansen S, Choat B, Hacke UG, Pratt RB, Bhaskar R, Brodribb TJ,  
575 Bucci SJ, Cao K-F, Cochard H, Delzon S, Domec J-C, Fan Z-X, Feild TS, Jacobsen  
576 AL, Johnson DM, Lens F, Maherali H, Martínez-Vilalta J, Mayr S, McCulloh KA,  
577 Mencuccini M, Mitchell PJ, Morris H, Nardini A, Pittermann J, Plavcová L, Schreiber  
578 SG, Sperry JS, Wright IJ, Zanne AE (2016) Weak tradeoff between xylem safety and  
579 xylem-specific hydraulic efficiency across the world's woody plant species. *New  
580 Phytologist* 209:123–136.
- 581 Hammond WM, Yu K, Wilson LA, Will RE, Anderegg WRL, Adams HD (2019) Dead or  
582 dying? Quantifying the point of no return from hydraulic failure in drought-induced  
583 tree mortality. *New Phytologist* 223:1834–1843.
- 584 Hartmann H, McDowell NG, Trumbore S (2015) Allocation to carbon storage pools in  
585 Norway spruce saplings under drought and low CO<sub>2</sub>. *Tree Physiol* 35:243–252.
- 586 Herbette S, Bouchet B, Brunel N, Bonnin E, Cochard H, Guillon F (2015) Immunolabelling  
587 of intervessel pits for polysaccharides and lignin helps in understanding their hydraulic  
588 properties in *Populus tremula* × *alba*. *Ann Bot* 115:187–199.
- 589 Herbette S, Cochard H (2010) Calcium Is a Major Determinant of Xylem Vulnerability to  
590 Cavitation. *Plant Physiology* 153:1932–1939.
- 591 Herbette S, Wortemann R, Awad H, Huc R, Cochard H, Barigah TS (2010) Insights into  
592 xylem vulnerability to cavitation in *Fagus sylvatica* L.: phenotypic and environmental

- 593 sources of variability. *Tree Physiol* 30:1448–1455.
- 594 Jansen S, Choat B, Pletsers A (2009) Morphological variation of intervessel pit membranes  
595 and implications to xylem function in angiosperms. *American Journal of Botany*  
596 96:409–419.
- 597 Jinagool W, Lamacque L, Delmas M, Delzon S, Cochard H, Herbette S (2018) Is there  
598 variability for xylem vulnerability to cavitation in walnut tree cultivars and species  
599 (*Juglans* spp.)? *HortScience* 53:132–137.
- 600 Jinagool W, Rattanawong R, Sangsing K, Barigah TS, Gay F, Cochard H, Kasemsap P,  
601 Herbette S (2015) Clonal variability for vulnerability to cavitation and other drought-  
602 related traits in *Hevea brasiliensis* Müll. Arg. *Journal of Plant Hydraulics* 2:e001.
- 603 Kim JS, Awano T, Yoshinaga A, Takabe K (2011) Temporal and spatial diversities of the  
604 immunolabeling of mannan and xylan polysaccharides in differentiating earlywood  
605 ray cells and pits of *Cryptomeria japonica*. *Planta* 233:109–122.
- 606 Lamy J-B, Bouffier L, Burlett R, Plomion C, Cochard H, Delzon S (2011) Uniform selection  
607 as a primary force reducing population genetic differentiation of cavitation resistance  
608 across a species range. *PLOS ONE* 6:e23476.
- 609 Lamy J-B, Plomion C, Kremer A, Delzon S (2012) QST < FST As a signature of canalization.  
610 *Molecular Ecology* 21:5646–5655.
- 611 Lens F, Sperry JS, Christman MA, Choat B, Rabaey D, Jansen S (2011) Testing hypotheses  
612 that link wood anatomy to cavitation resistance and hydraulic conductivity in the  
613 genus *Acer*. *New Phytologist* 190:709–723.
- 614 Lens F, Tixier A, Cochard H, Sperry JS, Jansen S, Herbette S (2013) Embolism resistance as  
615 a key mechanism to understand adaptive plant strategies. *Current Opinion in Plant*  
616 *Biology* 16:287–292.
- 617 Li S, Lens F, Espino S, Karimi Z, Klepsch M, Schenk HJ, Schmitt M, Schuldt B, Jansen S  
618 (2016) Intervessel pit membrane thickness as a key determinant of embolism  
619 resistance in angiosperm xylem. *IAWA Journal* 37:152–171.
- 620 Martínez-Vilalta J, Cochard H, Mencuccini M, Sterck F, Herrero A, Korhonen JFJ, Llorens  
621 P, Nikinmaa E, Nolè A, Poyatos R, Ripullone F, Sass-Klaassen U, Zweifel R (2009)  
622 Hydraulic adjustment of Scots pine across Europe. *New Phytologist* 184:353–364.
- 623 Niez B, Dlouha J, Moulia B, Badel É (2019) Water-stressed or not, the mechanical  
624 acclimation is a priority requirement for trees. *Trees* 33:279–291.
- 625 Pammenter NW, Van der Willigen C (1998) A mathematical and statistical analysis of the  
626 curves illustrating vulnerability of xylem to cavitation. *Tree Physiol* 18:589–593.
- 627 Plavcová L, Hacke UG (2012) Phenotypic and developmental plasticity of xylem in hybrid  
628 poplar saplings subjected to experimental drought, nitrogen fertilization, and shading.  
629 *J Exp Bot* 63:6481–6491.
- 630 Plavcová L, Hacke UG, Sperry JS (2011) Linking irradiance-induced changes in pit



- 631 membrane ultrastructure with xylem vulnerability to cavitation. *Plant, Cell &*  
632 *Environment* 34:501–513.
- 633 Plavcová L, Jansen S, Klepsch M, Hacke UG (2013) Nobody's perfect: can irregularities in  
634 pit structure influence vulnerability to cavitation? *Front Plant Sci* 4.  
635 [https://www.frontiersin.org/articles/10.3389/fpls.2013.00453/full?utm\\_source=newsletter&utm\\_medium=web&utm\\_campaign=Plant\\_Science-w48-2013](https://www.frontiersin.org/articles/10.3389/fpls.2013.00453/full?utm_source=newsletter&utm_medium=web&utm_campaign=Plant_Science-w48-2013) (11 September  
636 2019, date last accessed ).  
637
- 638 Schindelin J, Arganda-Carreras I, Frise E, Kaynig V, Longair M, Pietzsch T, Preibisch S,  
639 Rueden C, Saalfeld S, Schmid B, Tinevez J-Y, White DJ, Hartenstein V, Eliceiri K,  
640 Tomancak P, Cardona A (2012) Fiji: an open-source platform for biological-image  
641 analysis. *Nature Methods* 9:676–682.
- 642 Schneider CA, Rasband WS, Eliceiri KW (2012) NIH Image to ImageJ: 25 years of image  
643 analysis. *Nature Methods* 9:671–675.
- 644 Scholander PF, Bradstreet ED, Hemmingsen EA, Hammel HT (1965) Sap pressure in  
645 vascular plants: Negative hydrostatic pressure can be measured in plants. *Science*  
646 148:339–346.
- 647 Scholz A, Klepsch M, Karimi Z, Jansen S (2013b) How to quantify conduits in wood? *Front*  
648 *Plant Sci* 4. <https://www.frontiersin.org/articles/10.3389/fpls.2013.00056/full> (12  
649 September 2019, date last accessed ).
- 650 Scholz A, Rabaey D, Stein A, Cochard H, Smets E, Jansen S (2013a) The evolution and  
651 function of vessel and pit characters with respect to cavitation resistance across 10  
652 *Prunus* species. *Tree Physiol* 33:684–694.
- 653 Schuldt B, Knutzen F, Delzon S, Jansen S, Müller-Haubold H, Burlett R, Clough Y,  
654 Leuschner C (2016) How adaptable is the hydraulic system of European beech in the  
655 face of climate change-related precipitation reduction? *New Phytologist* 210:443–458.
- 656 Sperry JS, Hacke UG, Wheeler JK (2005) Comparative analysis of end wall resistivity in  
657 xylem conduits. *Plant, Cell & Environment* 28:456–465.
- 658 Steudle E (2001) The cohesion-tension mechanism and the acquisition of water by plant roots.  
659 *Annual Review of Plant Physiology and Plant Molecular Biology* 52:847–875.
- 660 Taylor-Teeple M, Lin L, Lucas M de, Turco G, Toal TW, Gaudinier A, Young NF, Trabucco  
661 GM, Veling MT, Lamothe R, Handakumbura PP, Xiong G, Wang C, Corwin J,  
662 Tsoukalas A, Zhang L, Ware D, Pauly M, Kliebenstein DJ, Dehesh K, Tagkopoulos I,  
663 Breton G, Pruneda-Paz JL, Ahnert SE, Kay SA, Hazen SP, Brady SM (2015) An  
664 *Arabidopsis* gene regulatory network for secondary cell wall synthesis. *Nature*  
665 517:571–575.
- 666 Tixier A, Herbette S, Jansen S, Capron M, Tordjeman P, Cochard H, Badel É (2014)  
667 Modelling the mechanical behaviour of pit membranes in bordered pits with respect to  
668 cavitation resistance in angiosperms. *Ann Bot* 114:325–334.
- 669 Tyree MT, Davis SD, Cochard H (1994) Biophysical perspectives of xylem evolution: is there  
670 a tradeoff of hydraulic efficiency for vulnerability to dysfunction? *IAWA Journal*

671 15:335–360.

672 Wheeler JK, Sperry JS, Hacke UG, Hoang N (2005) Inter-vessel pitting and cavitation in  
673 woody Rosaceae and other vesselless plants: a basis for a safety versus efficiency  
674 trade-off in xylem transport. *Plant, Cell & Environment* 28:800–812.

675 Wortemann R, Herbette S, Barigah TS, Fumanal B, Alia R, Ducousso A, Gomory D,  
676 Roedel-Drevet P, Cochard H (2011) Genotypic variability and phenotypic plasticity  
677 of cavitation resistance in *Fagus sylvatica* L. across Europe. *Tree Physiol* 31:1175–  
678 1182.

679 Zimmermann MH, Jeje AA (1981) Vessel-length distribution in stems of some American  
680 woody plants. *Can J Bot* 59:1882–1892.

681 Figure 1: Measurement of the embolism pressure ( $P_e$ ) of each individual vessel. A-D: Direct  
682 observation of embolism spread using a x-ray microtomograph in an intact xylem stem under  
683 increasing tension. Black areas reveal the embolized vessels. A: native state ( $\Psi = 0$  MPa).  
684 B:  $\Psi = - 1.5$  MPa. C:  $P_{50}$  state ( $\Psi = - 2.5$  MPa). D: final state ( $\Psi = - 4$  MPa). E: Cut of the  
685 same stem sample observed using light microscopy. The resulting image resolution allows us  
686 measuring accurately the anatomical traits. Colour represents the embolism pressure ( $P_e$ ) of  
687 each vessel, as measured with x-ray microtomography. Shown images are from a subset of  
688 approx. 230 vessels on a Control plant.

689

690 Figure 2: Xylem hydraulic traits in trees depending on the growth conditions. A: Xylem  
691 vulnerability to embolism curve. Each line is the mean curve per condition: Droughted,  $n = 9$   
692 from 9 trees; Control,  $n = 10$  from 5 trees; Shaded,  $n = 12$  from 6 trees. Dashed line,  
693 Droughted plants; full line, Control plants; dotted line, Shaded plants. Grey areas represent  
694 the standard deviations around the means. Horizontal dotted line indicates the 50 % loss of  
695 conductance. B: Hydraulic specific conductivity ( $K_s$ ). Data are mean values for 8 Droughted  
696 trees, 9 Control trees, 9 Shaded trees. Error bars show the standard deviation.

697

698 Figure 3: Correlation between  $P_{50}$  and several xylem structural traits. Data are squares of the  
699 coefficient of correlation ( $R^2$ ) for each factor with  $P_{50}$ . Black bars indicate pit-related traits  
700 and white bars indicate vessel and xylem-related traits. On the x-axis, a "+" symbol indicates  
701 a positive correlation, while a "-" symbol indicates a negative one. Stars indicate the  
702 significance of the correlation: "\*\*\*",  $p\text{-value} < 0.001$ ; "\*\*",  $0.001 < p\text{-value} < 0.01$ ; "ns",  
703 non-significant correlation.

704 Figure 4: Correlation between  $P_{50}$  and two xylem structural traits. A: Relationship between  
705  $P_{50}$  and pit area per vessel ( $A_p$ ). B: Relationship between  $P_{50}$  and vessel grouping index (GI).

706 Each point represents the mean value for an individual tree. Black circles refer to Droughted  
707 plants; white circles refer to Control plants and white squares refer to Shaded plants. The  
708 dotted line is the regression line.

709

710 Figure 5: Correlation between  $P_e$  and vessel traits inside a xylem. Data are all vessel  
711 measurements pooled from analyses on four individuals using X-ray microtomography. A-C:  
712 Vulnerability to embolism curves of vessels grouped by classes depending on structural traits.  
713 A: Vessels clustered by diameter ( $D_v^*$ ) classes. The dash sizes of the lines indicate the vessel  
714 diameter class: from full line (narrow vessels) to dotted line (wide vessels). B: Vessels  
715 clustered by classes for fraction of membrane length in contact with other vessels ( $F_c^*$ ). The  
716 dash sizes of the lines indicate the vessel contact fraction class: from full line (non-contact  
717 vessels) to dotted line (vessels sharing high portion of membrane length). C: Vessels are  
718 clustered by group size (GS) classes. The dash sizes of the lines indicate the vessel group  
719 sizes: from full line (solitary vessels) to dotted line (vessels in large groups). D: Correlation  
720 between  $P_e$  and xylem structural traits. Data are squares of the coefficient of correlation ( $R^2$ )  
721 for each factor with  $P_e$ . On the x-axis, a "+" symbol indicates a positive correlation, while a "-  
722 " symbol indicates a negative one. Stars indicate the significance of the correlation for the  
723 trait: "\*\*\*\*",  $p$ -value < 0.001.

724 Table 1: Meanings of the symbols.

| <b>Symbol</b>                    | <b>Definition</b>                                                                                    | <b>Unit</b>     |
|----------------------------------|------------------------------------------------------------------------------------------------------|-----------------|
| <b>LA</b>                        | Mean leaf area                                                                                       | cm <sup>2</sup> |
| <b>A<sub>p</sub></b>             | Mean total pit area per vessel                                                                       | mm <sup>2</sup> |
| <b>A<sub>v</sub></b>             | Mean area per vessel                                                                                 | mm <sup>2</sup> |
| <b>D<sub>a</sub></b>             | Mean pit aperture diameter                                                                           | μm              |
| <b>D<sub>p</sub></b>             | Mean pit diameter                                                                                    | μm              |
| <b>D<sub>v</sub></b>             | Mean vessel diameter                                                                                 | μm              |
| <b>D<sub>v</sub><sup>*</sup></b> | Vessel diameter                                                                                      | μm              |
| <b>F<sub>c</sub></b>             | Mean contact fraction: mean membrane length in contact with other vessels over total membrane length | %               |
| <b>F<sub>c</sub><sup>*</sup></b> | Vessel contact fraction: for each vessel, fraction of membrane length in contact with other vessels  | %               |
| <b>F<sub>p</sub></b>             | Mean pit fraction: mean total pit area in contact with other vessels over total vessel area          | %               |
| <b>F<sub>pf</sub></b>            | Mean pit-field fraction: pit area over inter-vessel area                                             | %               |
| <b>GI</b>                        | Vessel grouping index                                                                                | -               |
| <b>GS</b>                        | Vessel group size                                                                                    | -               |
| <b>L<sub>p</sub></b>             | Mean pit chamber depth                                                                               | μm              |
| <b>L<sub>v</sub></b>             | Median vessel length                                                                                 | μm              |
| <b>P<sub>e</sub></b>             | Pressure inducing embolism in a vessel                                                               | MPa             |
| <b>SI</b>                        | Vessel solitary index                                                                                | %               |
| <b>T<sub>m</sub></b>             | Mean pit membrane thickness                                                                          | μm              |

725

726 Table 2: Physiological characterisation of sapling grown under the three different conditions.

| <b>Factor</b>          | <b>Unit</b>                                              | <b>Droughted</b>             | <b>Control</b>               | <b>Shaded</b>                |
|------------------------|----------------------------------------------------------|------------------------------|------------------------------|------------------------------|
| $\Psi_{pd}$            | Mpa                                                      | - 0.59 ± 0.44 <sup>a</sup>   | - 0.14 ± 0.03 <sup>b</sup>   | - 0.11 ± 0.02 <sup>b</sup>   |
| $\Psi_{min}$           | MPa                                                      | - 1.44 ± 0.33 <sup>a</sup>   | - 0.98 ± 0.06 <sup>b</sup>   | - 0.98 ± 0.11 <sup>b</sup>   |
| <b>LA</b>              | cm <sup>2</sup>                                          | 87.64 ± 18.41 <sup>a</sup>   | 137.61 ± 17.55 <sup>b</sup>  | 184.13 ± 40.34 <sup>c</sup>  |
| <b>Height</b>          | mm                                                       | 1685 ± 187 <sup>a</sup>      | 2237 ± 263 <sup>b</sup>      | 2282 ± 76 <sup>b</sup>       |
| <b>Diameter</b>        | mm                                                       | 9.47 ± 0.83 <sup>a</sup>     | 13.96 ± 0.49 <sup>b</sup>    | 10.94 ± 0.61 <sup>b</sup>    |
| $K_h$                  | mmol.s <sup>-1</sup> .MPa <sup>-1</sup> .m <sup>-1</sup> | 527.21 ± 186.63 <sup>a</sup> | 766.92 ± 154.71 <sup>b</sup> | 780.60 ± 110.01 <sup>b</sup> |
| $K_s$                  | mmol.s <sup>-1</sup> .MPa <sup>-1</sup> .m <sup>-1</sup> | 585.65 ± 106.76 <sup>a</sup> | 579.50 ± 167.38 <sup>a</sup> | 529.88 ± 183.41 <sup>a</sup> |
| $P_{50}$               | MPa                                                      | - 3.03 ± 0.23 <sup>a</sup>   | - 2.49 ± 0.10 <sup>b</sup>   | - 2.27 ± 0.18 <sup>b</sup>   |
| $P_{12}$               | MPa                                                      | - 2.55 ± 0.34 <sup>a</sup>   | - 2.02 ± 0.11 <sup>b</sup>   | - 1.87 ± 0.11 <sup>b</sup>   |
| $P_{88}$               | MPa                                                      | - 3.51 ± 0.24 <sup>a</sup>   | - 2.95 ± 0.11 <sup>b</sup>   | - 2.68 ± 0.11 <sup>b</sup>   |
| <b>Native Embolism</b> | %                                                        | 1.81 ± 10.47 <sup>a</sup>    | - 7.48 ± 7.91 <sup>ab</sup>  | - 10.81 ± 7.84 <sup>b</sup>  |

727

728 Data are mean values ± standard deviation for each growth condition. For each line, values  
 729 not followed by the same letter differ significantly at  $p < 0.05$  (one-way ANOVA).  $\Psi_{pd}$ ,  
 730 Predawn water potential;  $\Psi_{min}$ , Minimum water potential; LA, Leaf area;  $K_h$ , Theoretical  
 731 hydraulic conductivity;  $K_s$ , Specific hydraulic conductivity;  $P_{50}$ ;  $P_{12}$ ;  $P_{88}$ , pressure inducing  
 732 50; 12 and 88 percent loss of conductance.

733 Table 3: Xylem structural traits depending on the growth conditions.

| <b>Trait</b> | <b>Unit</b>     | <b>Droughted</b>          | <b>Control</b>             | <b>Shaded</b>             |
|--------------|-----------------|---------------------------|----------------------------|---------------------------|
| $A_p$        | mm <sup>2</sup> | 1.20 ± 0.51 <sup>a</sup>  | 2.94 ± 0.65 <sup>b</sup>   | 3.78 ± 0.27 <sup>c</sup>  |
| $A_v$        | mm <sup>2</sup> | 8.21 ± 3.93 <sup>a</sup>  | 20.63 ± 3.64 <sup>b</sup>  | 26.65 ± 8.22 <sup>b</sup> |
| $D_a$        | μm              | 3.67 ± 0.34               | 3.37 ± 0.61                | 3.98 ± 0.81               |
| $D_p$        | μm              | 9.18 ± 0.69               | 8.64 ± 0.55                | 8.89 ± 0.72               |
| $D_v$        | μm              | 31.22 ± 6.14 <sup>a</sup> | 40.07 ± 1.98 <sup>b</sup>  | 42.71 ± 2.28 <sup>b</sup> |
| $F_c$        | %               | 20.35 ± 2.70 <sup>a</sup> | 19.01 ± 1.13 <sup>b</sup>  | 17.04 ± 0.96 <sup>c</sup> |
| $F_p$        | %               | 15.95 ± 1.13 <sup>a</sup> | 14.15 ± 0.77 <sup>b</sup>  | 12.53 ± 0.56 <sup>c</sup> |
| $F_{pf}$     | %               | 74.45 ± 1.33              | 74.46 ± 2.93               | 74.13 ± 2.75              |
| <b>GI</b>    | -               | 1.84 ± 0.20 <sup>a</sup>  | 1.63 ± 0.05 <sup>b</sup>   | 1.51 ± 0.05 <sup>c</sup>  |
| $L_p$        | μm              | 1.99 ± 0.06               | 2.08 ± 0.03                | 1.87 ± 0.11               |
| $L_v$        | mm              | 70.79 ± 25.1 <sup>a</sup> | 137.0 ± 18.86 <sup>b</sup> | 164.6 ± 48.4 <sup>c</sup> |
| <b>SI</b>    | %               | 33.13 ± 5.43 <sup>a</sup> | 38.46 ± 2.19 <sup>b</sup>  | 43.73 ± 3.11 <sup>c</sup> |
| $T_m$        | μm              | 0.26 ± 0.04               | 0.23 ± 0.04                | 0.24 ± 0.02               |

734 The meaning of the symbols is given in Table 1. For each trait, the method for measurement  
735 and number of replication are indicated in the methods section. Data are mean values ±  
736 standard deviation. For each line, values not followed by the same letter differ significantly at  
737  $p < 0.05$  (one-way ANOVA).

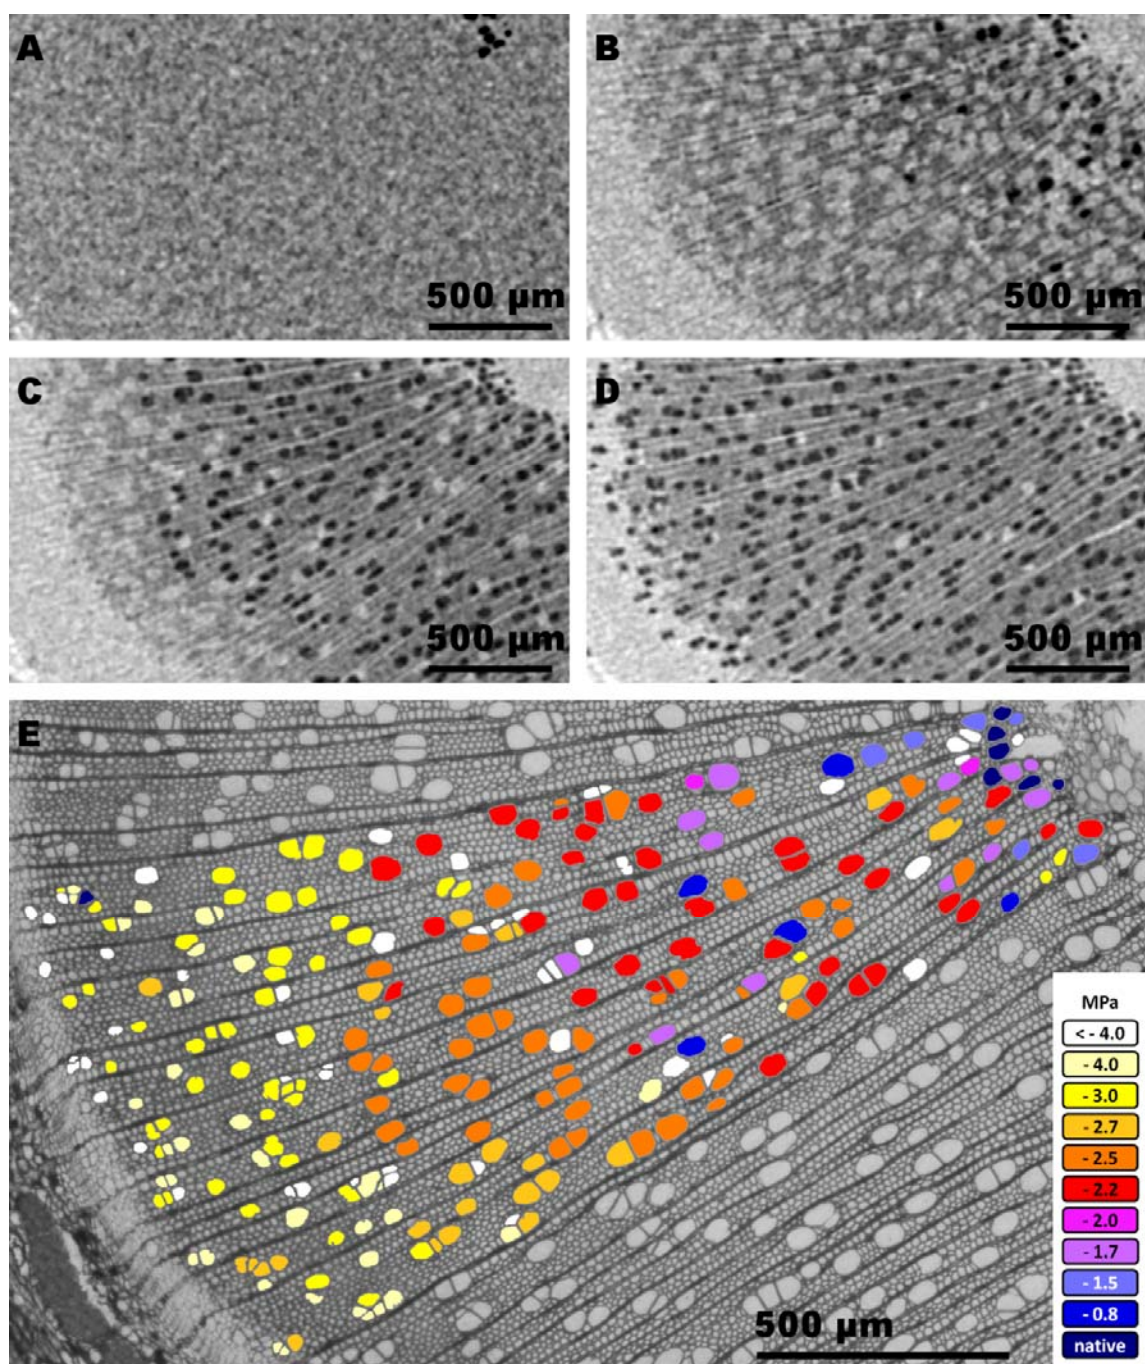

738

739 Figure 1: Measurement of the embolism pressure ( $P_e$ ) of each individual vessel. A-D: Direct  
740 observation of embolism spread using a x-ray microtomograph in an intact xylem stem under  
741 increasing tension. Black areas reveal the embolized vessels. A: native state ( $\Psi = 0$  MPa).  
742 B:  $\Psi = - 1.5$  MPa. C:  $P_{50}$  state ( $\Psi = - 2.5$  MPa). D: final state ( $\Psi = - 4$  MPa). E: Cut of the  
743 same stem sample observed using light microscopy. The resulting image resolution allows us



744 measuring accurately the anatomical traits. Colour represents the embolism pressure ( $P_e$ ) of  
745 each vessel, as measured with x-ray microtomography. Shown images are from a subset of  
746 approx. 230 vessels on a Control plant.

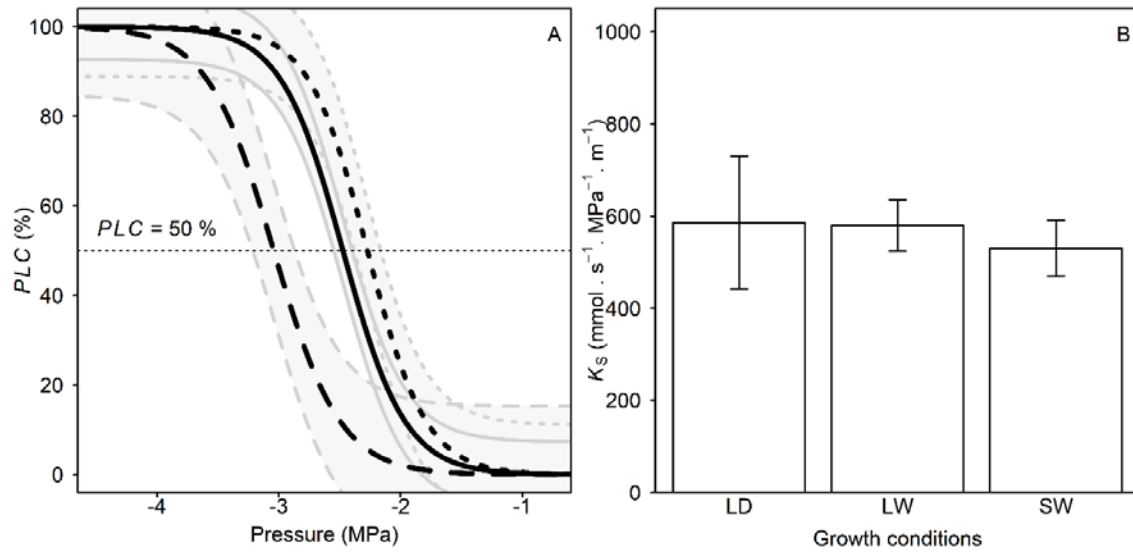

747

748 Figure 2: Xylem hydraulic traits in trees depending on the growth conditions. A: Xylem  
749 vulnerability to embolism curve. Each line is the mean curve per condition: Droughted, n = 9  
750 from 9 trees; Control, n = 10 from 5 trees; Shaded, n = 12 from 6 trees. Dashed line,  
751 Droughted plants; full line, Control plants; dotted line, Shaded plants. Grey areas represent  
752 the standard deviations around the means. Horizontal dotted line indicates the 50 % loss of  
753 conductance. B: Hydraulic specific conductivity ( $K_s$ ). Data are mean values for 8 Droughted  
754 trees, 9 Control trees, 9 Shaded trees. Error bars show the standard deviation.

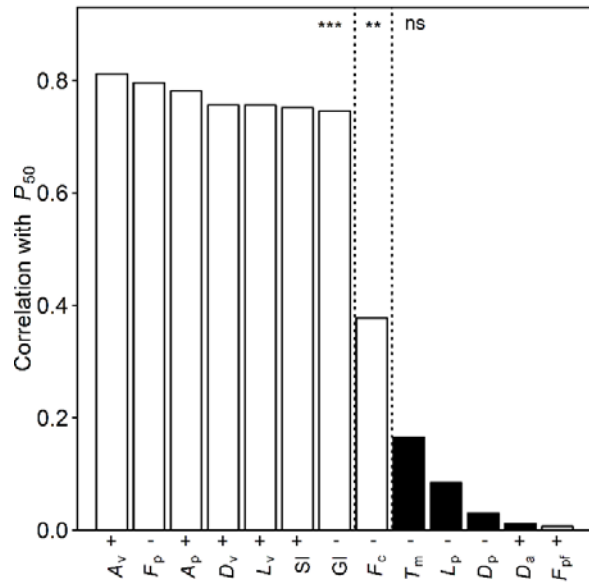

755

756 Figure 3: Correlation between  $P_{50}$  and several xylem structural traits. Data are squares of the  
757 coefficient of correlation ( $R^2$ ) for each factor with  $P_{50}$ . Black bars indicate pit-related traits  
758 and white bars indicate vessel and xylem-related traits. On the x-axis, a "+" symbol indicates  
759 a positive correlation, while a "-" symbol indicates a negative one. Stars indicate the  
760 significance of the correlation: "\*\*\*",  $p$ -value < 0.001; "\*\*",  $0.001 < p$ -value < 0.01; "ns",  
761 non-significant correlation.

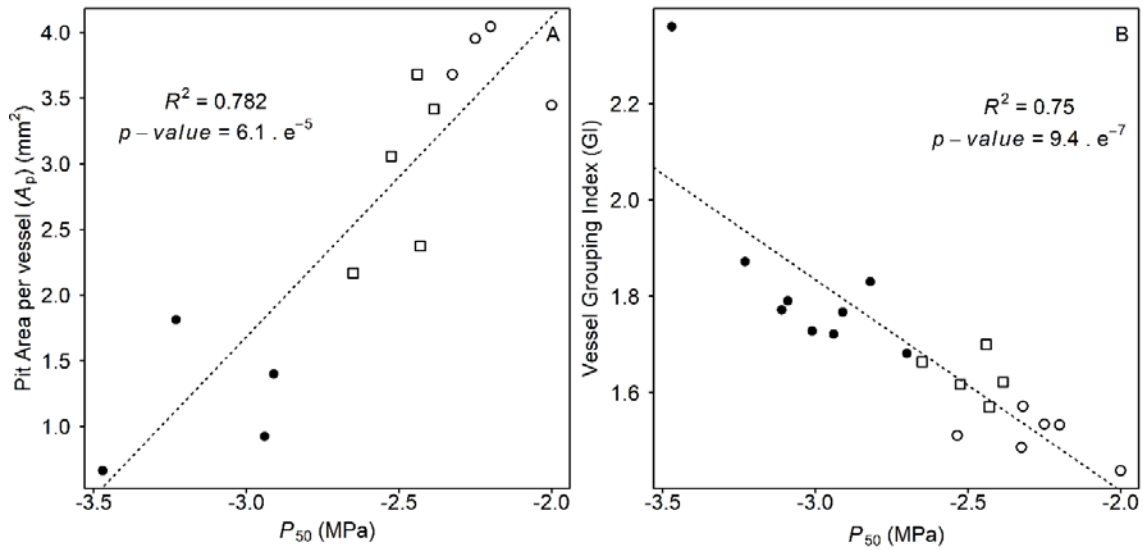

762

763 Figure 4: Correlation between  $P_{50}$  and two xylem structural traits. A: Relationship between

764  $P_{50}$  and pit area per vessel ( $A_p$ ). B: Relationship between  $P_{50}$  and vessel grouping index (GI).

765 Each point represents the mean value for an individual tree. Black circles refer to Droughted

766 plants; white circles refer to Control plants and white squares refer to Shaded plants. The

767 dotted line is the regression line.

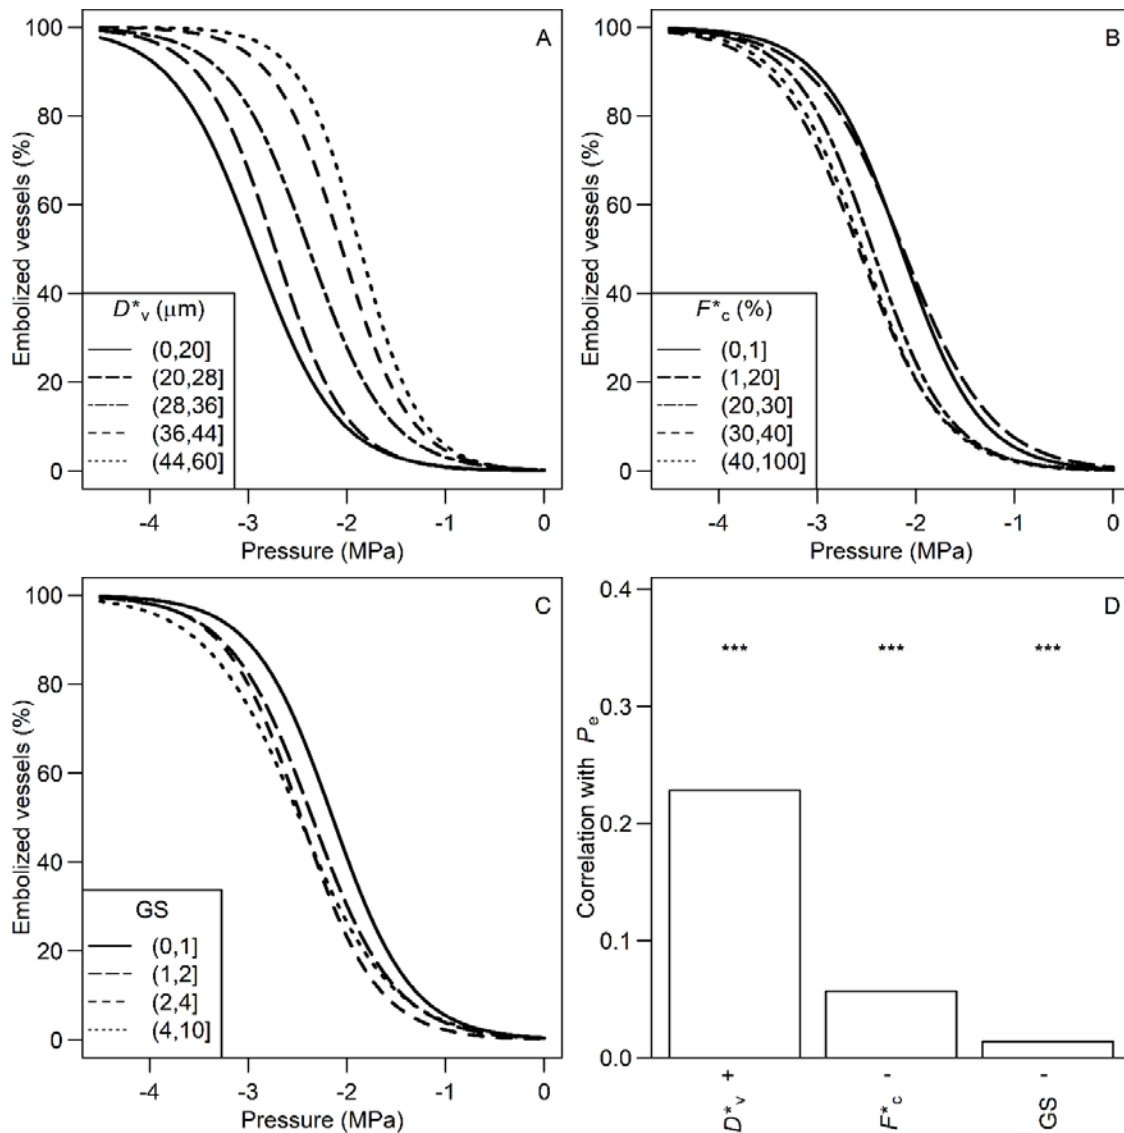

768

769 Figure 5: Correlation between  $P_e$  and vessel traits inside a xylem. Data are all vessel  
 770 measurements pooled from analyses on four individuals using X-ray microtomography. A-C:  
 771 Vulnerability to embolism curves of vessels grouped by classes depending on structural traits.  
 772 A: Vessels clustered by diameter ( $D_v^*$ ) classes. The dash sizes of the lines indicate the vessel  
 773 diameter class: from full line (narrow vessels) to dotted line (wide vessels). B: Vessels  
 774 clustered by classes for fraction of membrane length in contact with other vessels ( $F_c^*$ ). The  
 775 dash sizes of the lines indicate the vessel contact fraction class: from full line (non-contact  
 776 vessels) to dotted line (vessels sharing high portion of membrane length). C: Vessels are

777 clustered by group size (GS) classes. The dash sizes of the lines indicate the vessel group  
778 sizes: from full line (solitary vessels) to dotted line (vessels in large groups). D: Correlation  
779 between  $P_e$  and xylem structural traits. Data are squares of the coefficient of correlation ( $R^2$ )  
780 for each factor with  $P_e$ . On the x-axis, a "+" symbol indicates a positive correlation, while a "-  
781 " symbol indicates a negative one. Stars indicate the significance of the correlation for the  
782 trait: "\*\*\*\*",  $p$ -value < 0.001.
